# Supplementary material for: Searching for Genetic Biomarkers for Hereditary Angioedema Due to C1-Inhibitor Deficiency (C1-INH-HAE)
Source: Frontiers journal article supplement (doi:10.3389/falgy.2022.868185), 2022-07-07
Supplement: Data_Sheet_1.pdf [file Data_Sheet_1.pdf]

**Supplementary Table 1.** Allele frequency of the 18 selected common SNPs in our cohort, compared to GMAF and EMAF.

| SNP         | Gene            | Reference Allele | Homozygote Patients, % | Heterozygote Patients, % | Wild type Patients, % | Allele Frequency | GMAF   | EMAF   |
|-------------|-----------------|------------------|------------------------|--------------------------|-----------------------|------------------|--------|--------|
| rs1801020   | <b>F12</b>      | T                | 153/ 65.67%            | 73/ 31.33%               | 7/ 3.00%              | 81.33%           | 65.20% | 75.66% |
| rs5985      | <b>F13A1</b>    | G                | 12/ 5.15%              | 77/ 33.05%               | 144/ 61.80%           | 21.67%           | 20.46% | 25.33% |
| rs6003      | <b>F13B</b>     | G                | 173/ 74.25%            | 56/ 24.03%               | 4/ 1.72%              | 86.27%           | 88.22% | 90.60% |
| rs1799963   | <b>F2</b>       | G                | 0/ 0.00%               | 12/ 5.15%                | 221/ 98.85%           | 2.58%            | 0.84%  | 1.25%  |
| rs61751507  | <b>CPN1</b>     | G                | 0/ 0.00%               | 27/ 11.59%               | 206/ 88.41%           | 5.79%            | 4.23%  | 4.92%  |
| rs669       | <b>A2M</b>      | A                | 27/ 11.59%             | 98/ 42.06%               | 108/ 46.35%           | 32.62%           | 30.98% | 34.14% |
| rs5515      | <b>KLK1</b>     | G                | 0/ 0.00%               | 8/ 3.43%                 | 225/ 96.57%           | 1.72%            | 3.12%  | 3.70%  |
| rs3733402   | <b>KLKB1</b>    | G                | 71/ 30.47%             | 117/50.21%               | 45/ 19.31%            | 55.58%           | 54.02% | 50.59% |
| rs72550870  | <b>MASP2</b>    | A                | 0/ 0.00%               | 26/ 11.16%               | 207/ 88.84%           | 5.58%            | 2.14%  | 3.23%  |
| rs56378716  | <b>MPO</b>      | T                | 0/ 0.00%               | 4/ 1.72%                 | 229/ 98.28%           | 0.86%            | 1.02%  | 1.35%  |
| rs2227564   | <b>PLAU</b>     | T                | 138/ 59.23%            | 78/ 33.48%               | 17/ 7.30%             | 75.97%           | 74.83% | 76.39% |
| rs17580     | <b>SERPINA1</b> | A                | 0/ 0.00%               | 9/ 3.86%                 | 224/ 96.14%           | 1.93%            | 2.33%  | 3.65%  |
| rs28929474  | <b>SERPINA1</b> | G                | 0/ 0.00%               | 3/ 1.29%                 | 230/ 98.71%           | 0.64%            | 1.11%  | 1.84%  |
| rs121912714 | <b>SERPINA1</b> | A                | 0/ 0.00%               | 7/ 3.00%                 | 226/ 97.00%           | 1.50%            | 0.05%  | 0.05%  |
| rs6092      | <b>SERPINE1</b> | G                | 1/ 0.43%               | 51/ 21.89%               | 181/ 77.68%           | 11.37%           | 9.52%  | 11.31% |
| rs5743708   | <b>TLR2</b>     | G                | 0/ 0.00%               | 12/ 5.15%                | 221/ 94.85%           | 2.58%            | 1.74%  | 2.81%  |
| rs4926      | <b>SERPING1</b> | G                | 13/ 5.58%              | 78/ 33.48%               | 142/ 60.94%           | 22.32%           | 22.20% | 27.17% |
| rs28362944  | <b>SERPING1</b> | T                | 2/ 0.86%               | 39/ 16.74%               | 192/ 82.40%           | 9.23%            | 2.91%  | 4.67%  |

**Supplementary Table 2.** Allele frequency of the 18 selected SNPs in C1-INH-HAE patients according to their nationality, compared to GMAF and EMAF.

| SNP         | Gene            | Allele Frequency |            |           |            |             |            | GMAF   | EMAF   |
|-------------|-----------------|------------------|------------|-----------|------------|-------------|------------|--------|--------|
|             |                 | ALL (n=233)      | BUL (n=19) | GR (n=31) | GER (n=23) | HUN (n=113) | POL (n=47) |        |        |
| rs1801020   | <b>F12</b>      | 81.33%           | 81.58%     | 87.10%    | 80.43%     | 79.65%      | 81.91%     | 65.20% | 75.66% |
| rs5985      | <b>F13A1</b>    | 21.67%           | 26.32%     | 14.52%    | 26.09%     | 21.68%      | 22.34%     | 20.46% | 25.33% |
| rs6003      | <b>F13B</b>     | 86.27%           | 84.21%     | 88.71%    | 89.13%     | 87.61%      | 80.85%     | 88.22% | 90.60% |
| rs1799963   | <b>F2</b>       | 2.58%            | 2.63%      | 4.84%     | 0.00%      | 3.54%       | 0.00%      | 0.84%  | 1.25%  |
| rs61751507  | <b>CPN1</b>     | 5.79%            | 2.63%      | 8.06%     | 2.17%      | 6.19%       | 6.38%      | 4.23%  | 4.92%  |
| rs669       | <b>A2M</b>      | 32.62%           | 39.47%     | 16.13%    | 32.61%     | 32.30%      | 41.49%     | 30.98% | 34.14% |
| rs5515      | <b>KLK1</b>     | 1.72%            | 5.26%      | 4.84%     | 2.17%      | 0.00%       | 2.13%      | 3.12%  | 3.70%  |
| rs3733402   | <b>KLKB1</b>    | 55.58%           | 47.37%     | 43.55%    | 47.83%     | 57.96%      | 64.89%     | 54.02% | 50.59% |
| rs72550870  | <b>MASP2</b>    | 5.58%            | 2.63%      | 4.84%     | 4.35%      | 6.19%       | 6.38%      | 2.14%  | 3.23%  |
| rs56378716  | <b>MPO</b>      | 0.86%            | 2.63%      | 1.61%     | 0.00%      | 0.88%       | 0.00%      | 1.02%  | 1.35%  |
| rs2227564   | <b>PLAU</b>     | 75.97%           | 78.95%     | 91.94%    | 78.26%     | 70.80%      | 75.53%     | 74.83% | 76.39% |
| rs17580     | <b>SERPINA1</b> | 1.93%            | 0.00%      | 0.00%     | 0.00%      | 3.54%       | 1.06%      | 2.33%  | 3.65%  |
| rs28929474  | <b>SERPINA1</b> | 0.64%            | 0.00%      | 0.00%     | 2.17%      | 0.00%       | 2.13%      | 1.11%  | 1.84%  |
| rs121912714 | <b>SERPINA1</b> | 1.50%            | 2.63%      | 0.00%     | 0.00%      | 2.65%       | 0.00%      | 0.05%  | 0.05%  |
| rs6092      | <b>SERPINE1</b> | 11.37%           | 13.16%     | 6.45%     | 8.70%      | 12.83%      | 11.70%     | 9.52%  | 11.31% |
| rs5743708   | <b>TLR2</b>     | 2.58%            | 0.00%      | 0.00%     | 2.17%      | 3.54%       | 3.19%      | 1.74%  | 2.81%  |
| rs4926      | <b>SERPING1</b> | 22.32%           | 21.05%     | 19.35%    | 23.91%     | 19.91%      | 29.79%     | 22.20% | 27.17% |
| rs28362944  | <b>SERPING1</b> | 9.23%            | 5.26%      | 4.84%     | 2.17%      | 13.72%      | 6.38%      | 2.91%  | 4.67%  |
